# Supplementary material
Source: PubMed Central journal article supplement (PMC4469070)

## Supplementary Online Content

Carrión RE, McLaughlin D, Goldberg TE, et al. Prediction of functional outcome in individuals at clinical high risk for psychosis. *JAMA Psychiatry*. Published online September 4, 2013. doi:10.1001/jamapsychiatry.2013.1909.

**eAppendix.** Supplemental methods and results.

**eTable 1.** Neurocognitive domains, individual tests, and dependent measures.

**eTable 2.** Potential predictor domains and individual variables for the multivariable logistic regression models.

**eTable 3.** Demographic characteristics of participants at baseline.

**eFigure.** Receiver-operating characteristics (ROC) curve for a logistic regression model predicting social and role outcomes in individuals at clinical high risk of psychosis.

This supplementary material has been provided by the authors to give readers additional information about their work.

## eAppendix

### Supplemental Methods

After deriving logistic equations for the final models, predicted probabilities were developed for each subject and receiver operating characteristic curves were constructed to determine the accuracy of the models. The ROC curve displays the sensitivity (probability that a test will produce a true positive result) and specificity (probability that a test will produce a true negative result) as its discrimination threshold is varied (1). The area under the curve (AUC) with 95% confidence intervals was used as indicator of the probability that a randomly chosen respondent would be correctly distinguished based on their screened baseline variables (2). AUC values can range from 0.5 (indicates that an instrument can discriminate between groups no better than chance) to 1.0 (represents perfect discriminatory performance).

### Supplemental Results

Receiver operator characteristic curves were generated to determine the ability of the final models to discriminate between individuals with good and poor outcome. For social outcome, the AUC was 82.4 (95% CI, 73.6-91.3,  $P < .001$ ), indicating that for any randomly drawn pair of participants from these two functioning groups, the probability that a participant with poor social outcome would have poor social functioning, impaired processing speed and total behavioral disorganization  $\geq 4$  was 82.4% (see Supplemental Figure 1). For role outcome, the AUC was 77.2 (95% CI, 67.8-86.5,  $p < 0.001$ ), indicating an acceptable discriminative ability (see Supplemental Figure 2).

**eTable 1**

**Neurocognitive domains, Individual tests, and Dependent measures**

|                                                                                                                                       |                                                                                                                                             |
|---------------------------------------------------------------------------------------------------------------------------------------|---------------------------------------------------------------------------------------------------------------------------------------------|
| <b>Verbal Memory</b> ( $\alpha = .82$ , 4 tests)                                                                                      |                                                                                                                                             |
| California Verbal Learning Test (CVLT)<br>Total for trials 1–5<br>Long delay free recall                                              | Words recalled in trials 1-5<br>Recognition errors                                                                                          |
| Wechsler Memory Scale, Revised (WMS-R)<br>Logical Memory: Immediate and Delayed                                                       | Story elements recalled                                                                                                                     |
| <b>Working Memory</b> ( $\alpha = .78$ , 3 tests)                                                                                     |                                                                                                                                             |
| Wechsler Intelligence Scale for Children-III/Wechsler Adult Intelligence Scale-R (WISC-III/WAIS-R)<br>Digit Span Forward and Backward | Digit sequences recalled                                                                                                                    |
| Letter-Number Span                                                                                                                    | Number of correct trials                                                                                                                    |
| <b>Executive Function</b> ( $\alpha = .78$ , 5 tests)                                                                                 |                                                                                                                                             |
| Ruff Figural Fluency Test                                                                                                             | Number of correctly reproduced figures                                                                                                      |
| Wisconsin Card Sorting Test (WCST), Version 2<br>Perseverative Errors<br>Categories Completed<br><br>Conceptual Level Responses       | Percentage of perseverative errors;<br>Number of correctly completed categories<br>Number of consecutive correct responses in $\geq 3$ runs |
| Controlled Oral Word Association Test (COWAT)                                                                                         | Words produced in 1 minute                                                                                                                  |
| <b>Sustained Attention</b> ( $\alpha = .84$ , 3 tests)                                                                                |                                                                                                                                             |
| Continuous Performance Test-Identical Pairs (CPT-IP)<br>2-, 3-, and 4-digits                                                          | $d'$ (for all stimulus sets)                                                                                                                |
| <b>Processing Speed</b> ( $\alpha = .81$ , 4 tests)                                                                                   |                                                                                                                                             |
| Trails Making Test, Part A and B                                                                                                      | Time to complete trails                                                                                                                     |
| WISC-III/WAIS-R Digit Symbol Coding                                                                                                   | Symbols accurately coded in 2 minutes                                                                                                       |
| Symbol cancellation test                                                                                                              | Time to complete cancellation                                                                                                               |
| <b>Motor Speed</b> ( $\alpha = .75$ , 4 tests)                                                                                        |                                                                                                                                             |
| Finger Tapping Test, Dominant and Nondominant hand scores                                                                             | Taps in 10 seconds, over 5 blocks                                                                                                           |
| Grooved Pegboard Test, Dominant and Nondominant hand scores                                                                           | Time to place pegs                                                                                                                          |
| <b>Visuo-Spatial Processing</b> ( $\alpha = .63$ , 2 tests)                                                                           |                                                                                                                                             |
| Judgment of Line Orientation<br>WAIS-R/WISC-III Block Design                                                                          | Lines accurately matched<br>Correctly reconstruct blocks to match patterns on cards                                                         |
| <b>Language</b> ( $\alpha = .82$ , 3 tests)                                                                                           |                                                                                                                                             |
| Wide Range Achievement Test-III (WRAT-III) Reading                                                                                    | Total score for words read correctly                                                                                                        |
| Boston Naming Test                                                                                                                    | Number of correctly named items                                                                                                             |
| WAIS-R/WISC-III Vocabulary                                                                                                            | Number of words orally defined                                                                                                              |

**eTable 2. Potential Predictor Domains and Individual Variables for the Multivariable Logistic Regression Models**

| <b>Domain</b>                     | <b>Variables</b>                                                                                                                                                                                                   | <b>Variables Retained After Univariable Screening Procedure for Social Outcome Model (<math>P &lt; .15</math>)</b>                                   | <b>Variables Retained After Univariable Screening Procedure for Role Outcome Model (<math>P &lt; .15</math>)</b> |
|-----------------------------------|--------------------------------------------------------------------------------------------------------------------------------------------------------------------------------------------------------------------|------------------------------------------------------------------------------------------------------------------------------------------------------|------------------------------------------------------------------------------------------------------------------|
| <b>Demographics</b>               | Age at baseline<br>Level of education<br>Parental socio-economic status (SES)<br>Gender<br>Handedness<br>Race<br>Ethnicity<br>First-degree relative with Psychosis                                                 | Race<br>First-degree relative with Psychosis                                                                                                         | Age at baseline<br>Level of education                                                                            |
| <b>Intellectual Functioning</b>   | Estimated Current IQ                                                                                                                                                                                               | None                                                                                                                                                 | None                                                                                                             |
| <b>Neurocognitive Performance</b> | Processing speed<br>Verbal memory<br>Executive function<br>Working memory<br>Visuo-spatial processing<br>Motor speed<br>Sustained attention<br>Language                                                            | Processing Speed<br>Verbal Memory<br>Executive Function<br>Working Memory<br>Motor Speed<br>Language                                                 | Processing speed<br>Verbal memory<br>Executive function<br>Working memory<br>Sustained attention<br>Language     |
| <b>Positive Symptoms, SOPS</b>    | 5 Symptoms:<br>1. Unusual Thought Content<br>2. Suspiciousness<br>3. Grandiosity<br>4. Perceptual Abnormalities<br>5. Disorganized Communication<br>Absolute number of symptoms greater than 2, level 3, and level | Suspiciousness; Perceptual Abnormalities; Disorganized Communication<br><br>Total Positive Score<br>Absolute number of symptoms greater than level 4 | Suspiciousness; Grandiosity<br><br>Total Positive Score                                                          |

|                                    |                                                                                                                                                                                                                                                                                                   |                                                                                                                                                                                                  |                                                                                                                                                      |
|------------------------------------|---------------------------------------------------------------------------------------------------------------------------------------------------------------------------------------------------------------------------------------------------------------------------------------------------|--------------------------------------------------------------------------------------------------------------------------------------------------------------------------------------------------|------------------------------------------------------------------------------------------------------------------------------------------------------|
|                                    | 4<br>Total Positive Score (raw score;<br>cutoff > 15)                                                                                                                                                                                                                                             |                                                                                                                                                                                                  |                                                                                                                                                      |
| <b>Negative Symptoms, SOPS</b>     | 4 Symptoms:<br>1. Social Isolation<br>2. Avolition<br>3. Expression of Emotion<br>4. Experience of Emotion and Self<br>5. Ideational Richness<br>6. Occupational Functioning<br>Absolute number of symptoms greater than 2, level 3, and level 4<br>Total Negative Score (raw score; cutoff > 13) | Isolation <sup>a</sup><br>Avolition<br>Decreased Expression<br>Decreased Ideational Richness<br><br>Absolute number of symptoms greater than 2, level 3, and level 4<br><br>Total Negative Score | Avolition, Decreased Ideational Richness, Deteriorating Role <sup>a</sup><br><br>Absolute number of symptoms greater than level 4                    |
| <b>Disorganized Symptoms, SOPS</b> | 4 Symptoms:<br>1. Odd Behavior or Appearance<br>2. Bizarre Thinking<br>3. Trouble with Focus and Attention<br>4. Hygiene Social Attentiveness<br>Absolute number of symptoms greater than 2, level 3, and level 4<br>Total Disorganized Score (raw score; cutoff > 4)                             | Odd Behavior; Bizarre Thinking; Hygiene Social Attentiveness<br><br>Total Disorganized Score (>4)<br><br>Absolute number of symptoms greater than 2                                              | Odd Behavior; Attention Trouble; Hygiene Social Attentiveness<br><br>Total Disorganized Score (>4)<br><br>Absolute number of symptoms greater than 3 |
|                                    | 4 Symptoms:<br>1. Sleep Disturbances<br>2. Dysphoric Mood<br>3. Motor Disturbances<br>4. Impaired Tolerance to                                                                                                                                                                                    | Sleep Disturbances; Motor Disturbances                                                                                                                                                           | Sleep Disturbances; Motor Disturbances                                                                                                               |

|                                       |                                                                                                                                                                                                                                                                                                                                                   |                     |                                                     |
|---------------------------------------|---------------------------------------------------------------------------------------------------------------------------------------------------------------------------------------------------------------------------------------------------------------------------------------------------------------------------------------------------|---------------------|-----------------------------------------------------|
|                                       | <p>Normal Stress</p> <p>Absolute number of symptoms greater than 2, level 3, and level 4</p> <p>Total General Score (raw score; cutoff &gt; 6)</p>                                                                                                                                                                                                |                     |                                                     |
| <b>Total score, SOPS</b>              | <p>Raw score; cutoff &gt; 41</p> <p>Absolute number of symptoms greater than 2, level 3, and level 4</p>                                                                                                                                                                                                                                          | Total score, SOPS   | Total score, SOPS                                   |
| <b>Social and Role Functioning</b>    | <p>Baseline GF: Social</p> <p>Baseline GF: Role</p> <p>GF: Social or Role deterioration of 10%</p> <p>GF: Social or Role deterioration of 30%</p> <p>Global Assessment of Functioning (GAF)</p>                                                                                                                                                   | Baseline GF: Social | Baseline GF: Role; GAF                              |
| <b>Diagnostic Comorbidity: Axis 1</b> | <p>DSM-IV diagnoses:</p> <p>Any mood disorder</p> <p>Any anxiety disorder</p> <p>Any mood or anxiety</p> <p>Any substance abuse disorder</p> <p>Major depressive disorder</p> <p>Generalized anxiety</p> <p>Agoraphobia</p> <p>Obsessive-compulsive disorder</p> <p>Panic</p> <p>Social phobia</p> <p>Cannabis</p> <p>Alcohol</p> <p>Nicotine</p> | Any Mood disorder   | Any mood disorder; Attention deficit hyper disorder |
| <b>Diagnostic Comorbidity: Axis 2</b> | <p>DSM-IV diagnoses:</p> <p>Paranoid</p> <p>Schizoid</p>                                                                                                                                                                                                                                                                                          | None                | None                                                |

|  |             |  |  |
|--|-------------|--|--|
|  | Schizotypal |  |  |
|--|-------------|--|--|

<sup>a</sup>These variables were subsequently removed from the models due to high collinearity.

**eTable 3. Demographic Characteristics of Participants at Baseline**

| <b>Characteristic</b>                  | <b>Healthy Control Subjects (n=68)</b> | <b>Clinical High-Risk, Positive Group (n=92)</b> | <b><i>P</i> value</b> |
|----------------------------------------|----------------------------------------|--------------------------------------------------|-----------------------|
| Age, y, mean (SD)                      | 16.32 (2.62)                           | 15.96 (2.18)                                     | .34                   |
| Estimated Current IQ, mean (SD)        | 109.94 (13.25)                         | 103.41 (16.06)                                   | <.01                  |
| Years of education, mean (SD)          | 10.52 (2.62)                           | 9.72 (2.16)                                      | .08                   |
| Gender, No. (%)                        |                                        |                                                  |                       |
| Female                                 | 35 (51.5)                              | 34 (37.0)                                        | .08                   |
| Handedness, right, No. (%)             | 60 (88.2)                              | 78 (84.8)                                        | .65                   |
| Parental SES <sup>a</sup> Low, No. (%) | 7 (10.9)                               | 6 (6.6)                                          | .39                   |
| Race, No. (%)                          |                                        |                                                  |                       |
| White                                  | 42 (61.8)                              | 74 (80.4)                                        | .01                   |
| Ethnic Origin, No. (%)                 |                                        |                                                  |                       |
| Hispanic                               | 3 (4.4)                                | 13 (14.1)                                        | .06                   |

<sup>a</sup> Socioeconomic status, Hollingshead index (Hollingshead & Redlich, 1958), where 1–3 “high” and 4–5 “low”.



## References

1. Altman DG, Bland JM: Diagnostic tests. 1: Sensitivity and specificity. *Bmj* 1994; 308(6943):1552
2. Hanley JA, McNeil BJ: The meaning and use of the area under a receiver operating characteristic (ROC) curve. *Radiology* 1982; 143(1):29-36

## **eFigure Captions**

*eFigure. Panel A.* Receiver-operating characteristics (ROC) curve for a logistic regression model predicting social outcome in individuals at clinical high risk of psychosis. The ROC curve plots the true positive rate (sensitivity) against the false-positive rate (1-specificity) for different cut-points. The more closely the curve follows the top and left-hand border of the ROC space, the more accurate the test. The area under the curve (AUC) with 95% confidence intervals was used as indicator of the probability that a randomly chosen respondent would be correctly distinguished based on the prediction model.

*eFigure. Panel B.* Receiver-operating characteristics (ROC) curve for a logistic regression model predicting role outcome in individuals at CHR of psychosis.

A.

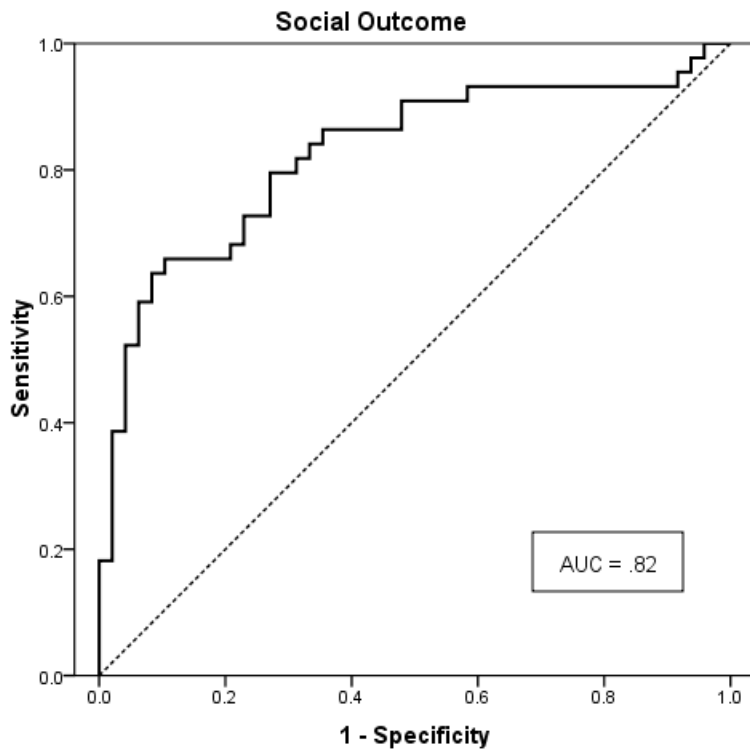

B.

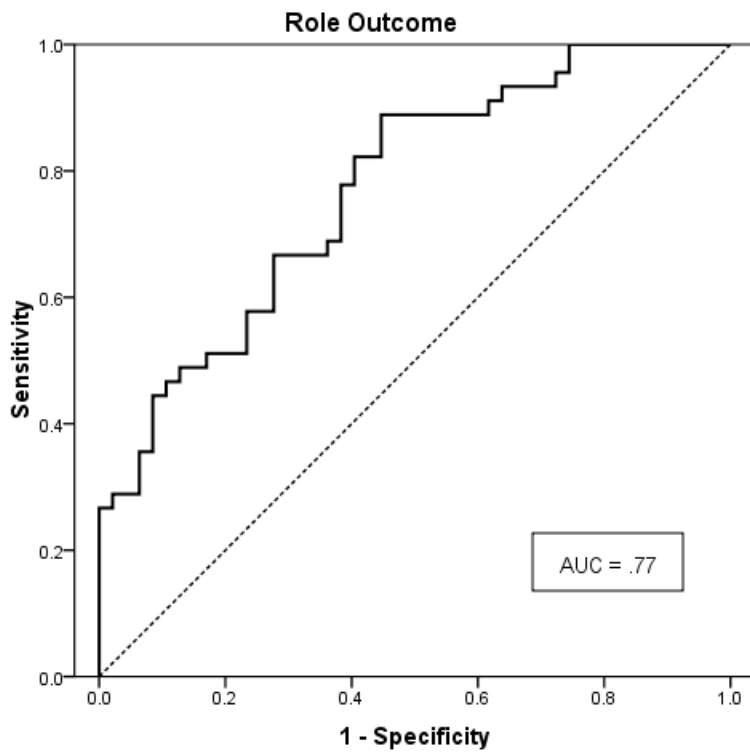

Supplement: NIHMS535119-supplement-Supplement.pdf [file NIHMS535119-supplement-Supplement.pdf]
